# Supplementary material
Source: Springer Nature journal article supplement (https://www.springermedizin.de/resource/supplementary/12871_2011_108_MOESM2_ESM.pdf/9428850)

### A: isoproterenol (-)

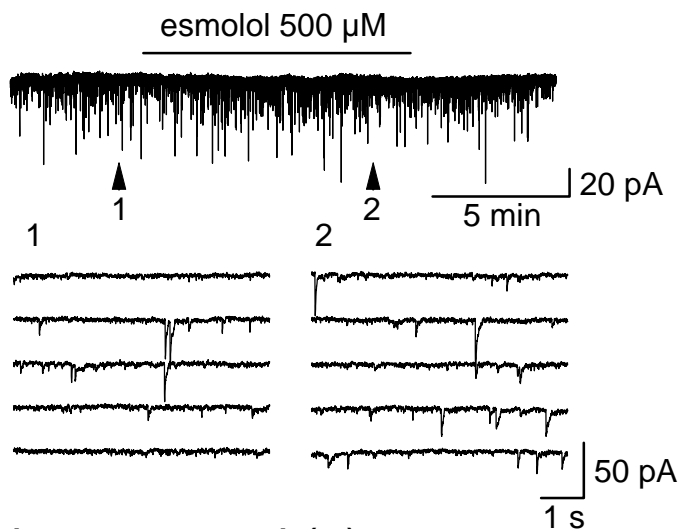

### B: isoproterenol (+)

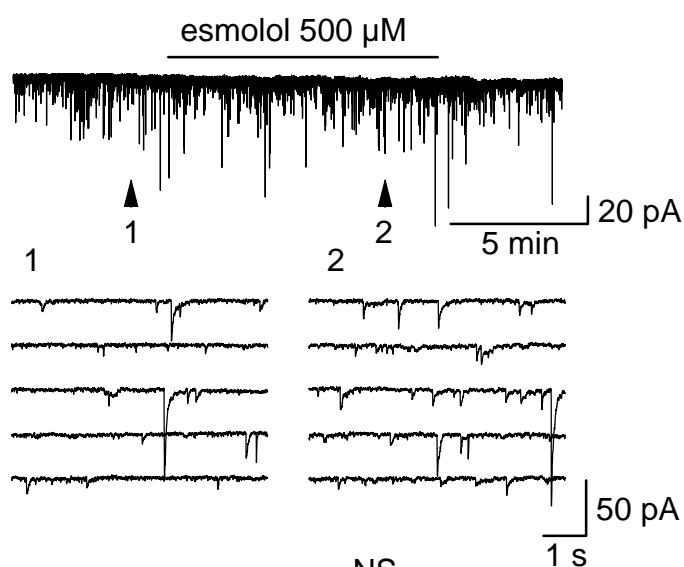

### C

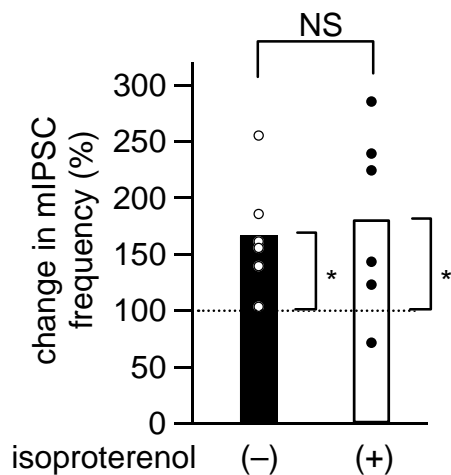

### D

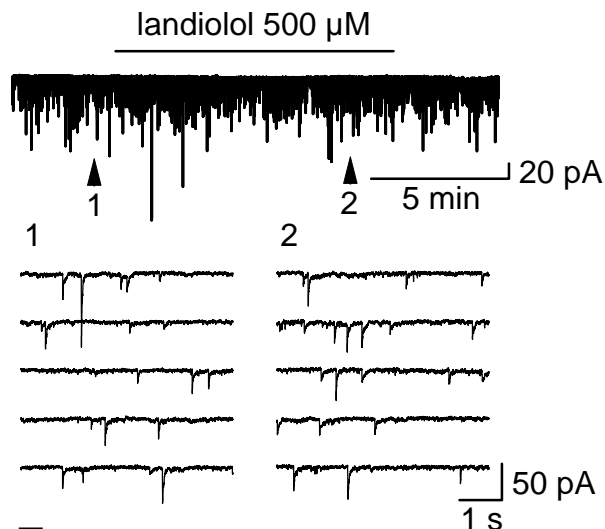

### E

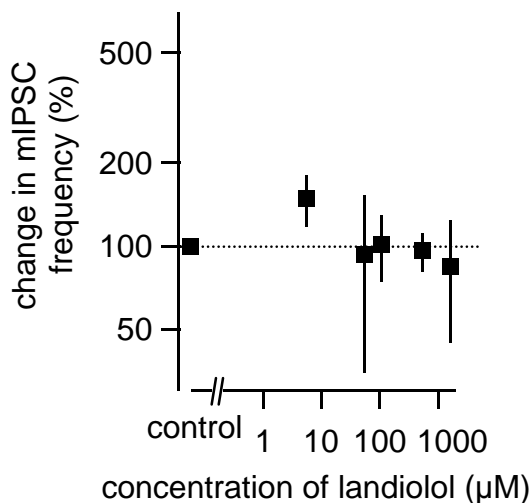

Supplement: MOESM2 [file 9428850]
